# Supplementary material for: X1INH, an improved next-generation affinity-optimized hydrazonic ligand, attenuates abnormal copper(i)/copper(ii)-α-Syn interactions and affects protein aggregation in a cellular model of synucleinopathy
Source: Royal Society of Chemistry journal article supplement (doi:10.1039/d0dt01138j), 2020-01-01
Supplement: d0dt01138j1.pdf [file d0dt01138j1.pdf]

# **X1INH, improved next-generation affinity-optimized hydrazonic ligand, attenuates abnormal copper(I)/copper(II)- $\alpha$ -Syn interactions and affects protein aggregation in a cellular model of synucleinopathy**

Daphne S. Cukierman<sup>1,2</sup>, Diana F. Lázaro<sup>2</sup>, Pamela Sacco<sup>3</sup>, Patrícia Ribeiro Ferreira<sup>1</sup>, Renata Diniz<sup>4</sup>, Claudio O. Fernández<sup>3</sup>, Tiago F. Outeiro<sup>2,5,6</sup>, Nicolás A. Rey<sup>1\*</sup>

## **Supplementary Information**

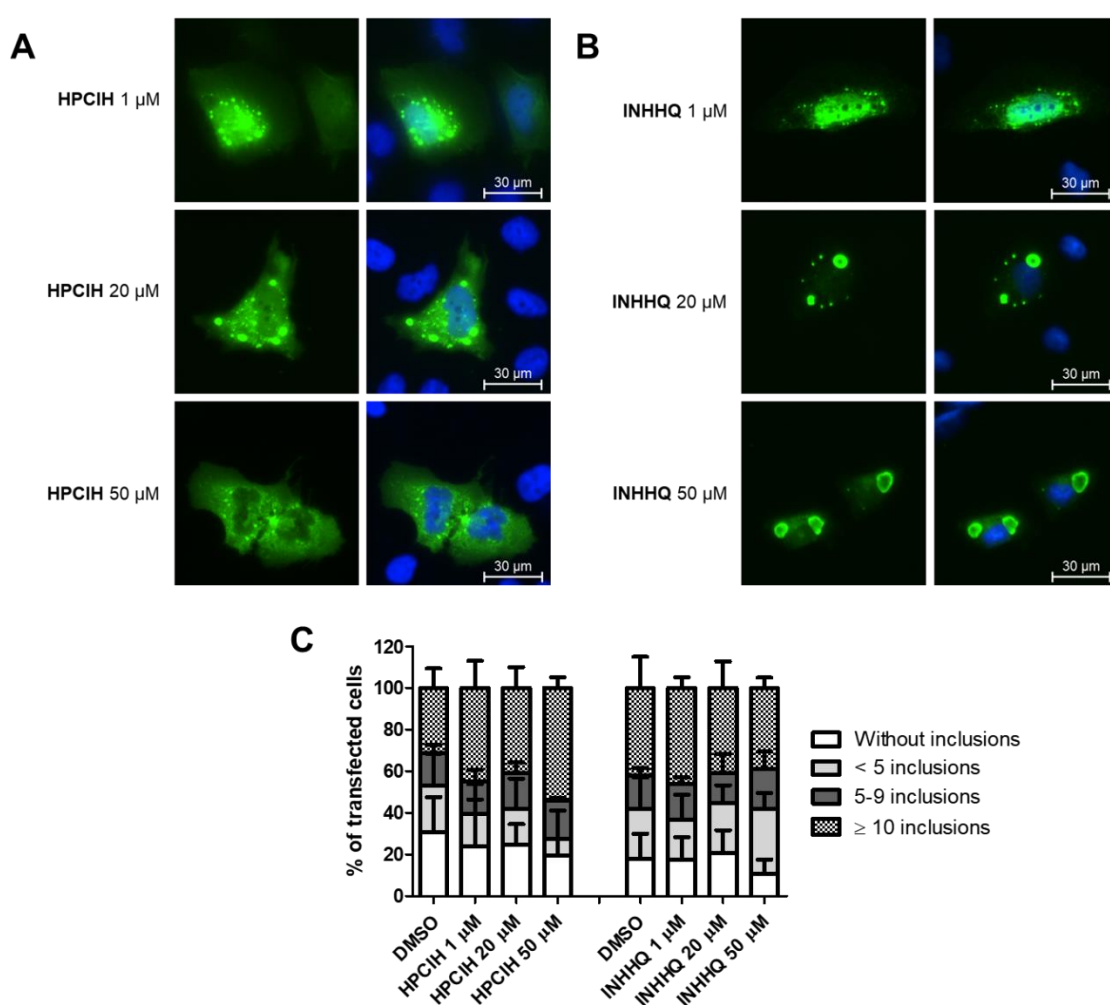

Figure S1. Effect of different concentrations of structure-related *N*-acyl-hydrazones in SynT inclusions:

- (A) Representative images of the inclusion pattern in transfected cells treated with HPCIH.
- (B) Representative images of the inclusion pattern in transfected cells treated with INHHQ.
- (C) Quantification of the inclusions divided by groups.  $\alpha$ -Syn localization is highlighted in green, while the cell nuclei are colored in blue.

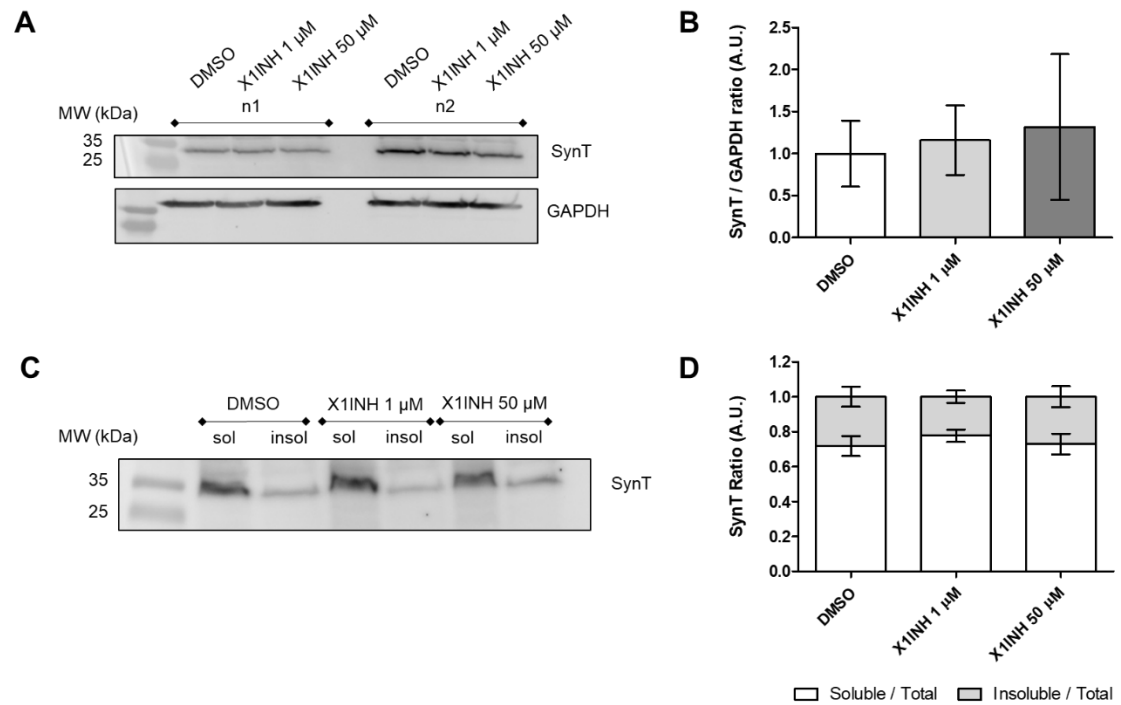

Figure S2. Levels of Syn-T and its partition in Triton-X100 soluble/insoluble fractions after X1INH treatments. **(A)** Representative immunoblot showing the expression levels of SynT and GAPDH. **(B)** Expression levels of Syn-T normalized to GAPDH. **(C)** Representative immunoblot showing the levels of Syn-T in Triton-X100 soluble and insoluble fractions. **(D)** Triton-X100 soluble and insoluble fractions normalized to total amount of Syn-T.
